# Supplementary material for: Low temperature direct bonding of silica glass via wet chemical surface activation
Source: Royal Society of Chemistry journal article supplement (doi:10.1039/c5ra06705g), 2015-01-01
Supplement: c5ra06705g3.pdf [file c5ra06705g3.pdf]

**Electronic Supplementary Information for**  
**Low temperature direct bonding of silica glass via wet**  
**chemical surface activation**

**Chengle Mai,<sup>a</sup> Mingyu Li<sup>\*a</sup> and Shihua Yang<sup>b</sup>**

*<sup>a</sup>State Key Laboratory of Advanced Welding and Joining, Harbin Institute of Technology  
Shenzhen Graduate School, Shenzhen, 518055, People's Republic of China. E-mail:  
myli@hit.edu.cn (M. Li); Tel: +86-755-26033463.*

*<sup>b</sup>Shanghai Aerospace Equipments Manufacturer, Shanghai, 200245, People's Republic of China.*

This supporting information includes:

**Fig. S1** Schematics of experimental setup for the maximum pressure tests.

**Fig. S2** Top view optical image of the channel with dyed water after the leakage test.

**Movie 1:** Result of leakage test done by infusing a red dye solution through the channel. (attached as a separated file)

**Movie 2:** Result of leakage test done by closing the channel end using rubber. (attached as a separated file)

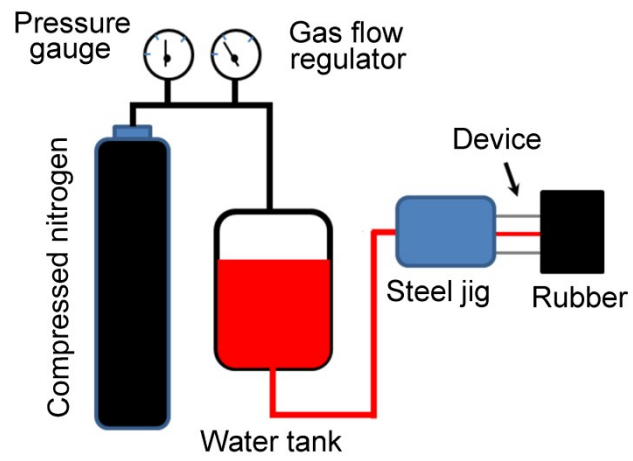

**Fig. S1** Schematics of experimental setup for the maximum pressure tests.

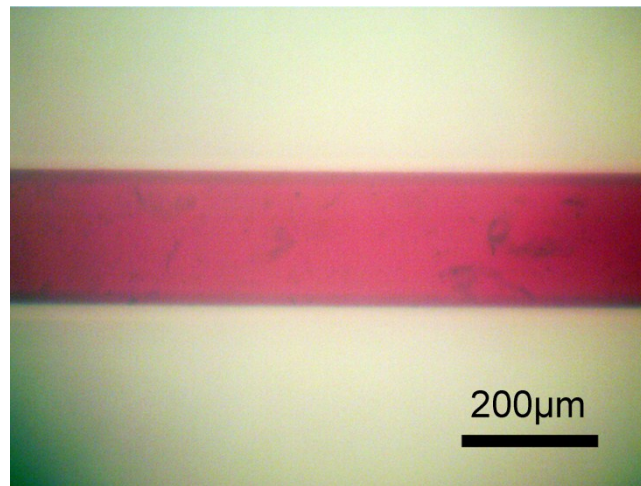

**Fig. S2** Top view optical image of the channel with dyed water after the leakage test.
